1 Research Articles

2 ***CcLBD25* functions as a key regulator of haustorium development in *Cuscuta***

3 ***campestris***

4 **Authors:** Min-Yao Jhu<sup>1</sup>, Yasunori Ichihashi<sup>1,2</sup>, Moran Farhi<sup>1,3</sup>, Caitlin Wong<sup>1</sup>, Neelima

5 R. Sinha<sup>1\*</sup>

6 **Affiliations:**

7 <sup>1</sup> The Department of Plant Biology, University of California, Davis, CA, 95616, United  
8 States.

9 <sup>2</sup> RIKEN BioResource Research Center, Tsukuba, Ibaraki 305-0074, Japan

10 <sup>3</sup> The Better Meat Co., 2939 Promenade St. West Sacramento, CA, 95691, USA.

11 \* Email address correspondence to [nrsinha@ucdavis.edu](mailto:nrsinha@ucdavis.edu).

12 **Author Contributions:**

13 Y.I. initiated the project and all work was done under consultation and supervision from  
14 N. R. S.; Y.I. wrote the original R scripts for MDS, PCA, and SOM analysis, and M.-Y.J.  
15 edited the scripts and applied them on further analyses; M.-Y.J. mapped the  
16 transcriptome data to *C. campestris* genome and performed SOM clustering and  
17 coexpression network analysis; M.F. made *CcLBD25* RNAi constructs and used the UC  
18 Davis transformation facility to generate transgenic plants; M.-Y.J. performed qPCR,  
19 functional characterization and phenotyping of *CcLBD25* transgenic plants; M.-Y.J.  
20 designed the IVH system and conducted HIGS experiments and analyzed the data; M.F.

21 conducted LCM to capture tissues and prepared libraries for RNA-Seq; M.-Y.J. mapped  
22 the LCM RNA-Seq data to *C. campestris* genome and performed SOM clustering and  
23 GCN analysis; M.-Y.J. conducted phylogenetic analysis and verified *Cuscuta* species; C.  
24 W. analyzed haustorium connection status, M.-Y.J. wrote the initial manuscript and made  
25 figures and tables with primary editing from N.R.S.; N.R.S. supervised this project and  
26 serves as the author responsible for contact and communication.

27

28 **One-sentence summary:**

29 *CcLBD25* plays a pivotal role in haustorium initiation, regulating pectin digestion, and  
30 searching hyphae development during the haustorium penetration process.

31

32 **Short title:**

33 ***LBD25* regulates dodder haustorium development**

34

35

36 **Abstract**

37 Parasitic plants reduce yield of crops worldwide. *Cuscuta campestris* is a stem parasite  
38 that attaches to its host, using haustoria to extract nutrients and water. We analyzed the  
39 transcriptome of six *C. campestris* tissues and identified a key gene, *CcLBD25*, as highly  
40 expressed in prehaustoria and haustoria. Our gene co-expression networks (GCN) from  
41 different tissue types and laser-capture microdissection (LCM) RNA-Seq data indicate  
42 that *CcLBD25* could be essential for regulating cell wall loosening and organogenesis.  
43 We employed host-induced gene silencing (HIGS) by generating transgenic tomato hosts  
44 that express hairpin RNAs to target and down-regulate *CcLBD25* in the parasite. Our  
45 results showed that *C. campestris* growing on *CcLBD25* RNAi transgenic tomatoes  
46 transited to the flowering stage earlier and had less biomass compared with *C. campestris*  
47 growing on wild type host. This suggests that the parasites growing on the transgenic  
48 plants were stressed due to insufficient nutrient acquisition. Anatomy of *C. campestris*  
49 haustoria growing on *CcLBD25* RNAi tomatoes showed reduced pectin digestion and  
50 lack of searching hyphae, which interfered with haustorium penetration and the formation  
51 of vascular connections. We developed an *in vitro* haustorium (IVH) system to assay the  
52 number of prehaustoria produced on strands from *C. campestris*. When *C. campestris*  
53 was grown on *CcLBD25* RNAi tomatoes or wild type tomatoes, the former produce fewer  
54 prehaustoria than the latter, indicating that down-regulating *CcLBD25* may affect  
55 haustorium initiation. The results of this study shed light on the role of *CcLBD25* in  
56 haustorium development and might help to develop a parasite-resistant system in crops.

57

## 58 **Introduction**

59 Parasitic plants are heterotrophic, reducing the yields of crops worldwide (Agrios, 2005;  
60 Yoder and Scholes, 2010). They parasitize host plants using specialized organs known as  
61 haustoria, which extract nutrients and water from the hosts. *Cuscuta* species (dodders) are  
62 stem holoparasites without functional roots and leaves. Stems of *Cuscuta* spp. coil  
63 counterclockwise around their host and then form a series of haustoria along the stems to  
64 attach to their hosts (Furuhashi et al., 2011; Alakonya et al., 2012). *Cuscuta campestris* is  
65 one of the most widely distributed and destructive parasitic weeds. A better  
66 understanding of the underlying molecular mechanisms of *C. campestris* haustorium  
67 development will aid in the application of parasitic weed control and producing parasitic  
68 plant-resistant crops.

69 Many previous studies have identified the key factors needed for seed  
70 germination, host recognition, and haustorium induction and growth in root parasites  
71 (Shen et al., 2006; López-Ráez et al., 2009; Yoder and Scholes, 2010). Focusing on  
72 haustorium development, a previous study indicated that root parasitic plants co-opted the  
73 mechanism of lateral root formation in haustorium organogenesis (Ichihashi et al., 2017).  
74 LATERAL ORGAN BOUNDARIES DOMAIN (LBD) family of transcription factors  
75 (TFs) are reported to be crucial in both lateral root formation in non-parasitic plants and  
76 haustorium developmental programming in root parasites (Ichihashi et al., 2020). In non-  
77 parasitic model plants, like *Arabidopsis*, LBD genes are shown to be involved in auxin  
78 signaling, interact with AUXIN RESPONSE FACTORS (ARFs) and promote lateral root  
79 formation (Mangeon et al., 2010; Porco et al., 2016). Further, LBD orthologs are reported  
80 to be upregulated during the haustorium development stage at attachment sites in root

81 parasitic plants like *Thesium chinense* (Ichihashi et al., 2017) and *Striga hermonthica*  
82 (Yoshida et al., 2019). On the other hand, the molecular pathways regulating haustorium  
83 development in stem parasitic plants are still largely unexplored. Although a few gene  
84 orthologs that regulate auxin accumulation during lateral root development in non-  
85 parasitic plants are found to be expressed in *Cuscuta* seedling and stems, whether these  
86 genes are also involved haustorium formation is still unknown (Ranjan et al., 2014). Our  
87 previous studies showed that the *SHOOT MERISTEMLESS*-like (*STM*) plays a role in  
88 *Cuscuta* spp. haustorium development (Alakonya et al., 2012). These results suggest that  
89 *Cuscuta* spp. might have repurposed the shoot developmental programs into haustorium  
90 organogenesis, but whether *Cuscuta* spp. also co-opted the lateral root programming  
91 system into haustorium development remains an open question.

92         In this study, we provide an insight into the gene regulatory mechanisms of  
93 haustorium organogenesis and identify one of the LBD transcription factors, *CcLBD25*,  
94 as a vital regulator of *C. campestris* haustorium development. This discovery supports the  
95 hypothesis that stem parasitic plants adapted both shoot and root molecular machinery  
96 into haustorium formation. Using detailed transcriptome analysis and gene coexpression  
97 networks coupled with cellular and developmental phenotypic assays, we also show that  
98 *CcLBD25* is not only involved in haustorium initiation through the auxin signaling, but  
99 also participates in other aspects of haustorial developmental reprogramming, including  
100 cell wall loosening, searching hyphae development, and other phytohormone mediated  
101 signaling pathways. The results of this study will not only shed light on the field of  
102 haustorium development in stem parasitic plants but also help develop a potential

103 universal parasitic weed-resistant system in crops to reduce economic losses caused by

104 both root and stem parasites.

105



## 107 **Results**

### 108 **Establishing genomic resources for *C. campestris* and constructing gene**

### 109 **coexpression networks regulating haustorium formation**

110 In this study, we analyzed the transcriptome of different *C. campestris* tissues, including  
111 seeds, seedlings, stems, prehaustoria, haustoria, and flowers, grown on the tomato  
112 (*Solanum lycopersicum*) Heinz 1706 (H1706) cultivar and *Nicotiana benthamiana* (*N.*  
113 *benthamiana*) (Ranjan et al., 2014) by mapping to the recently available genome of *C.*  
114 *campestris* (Vogel et al., 2018). In general, seed tissues have distinctively different gene  
115 expression profiles compared to all other tissues (Supplemental Fig. 1). In addition, the  
116 expression patterns in invasive tissues (prehaustoria and haustoria) and non-invasive  
117 tissues are also disparate (Supplemental Fig. 1). We conducted PCA analysis and noticed  
118 the genes that are highly expressed in invasive tissues can be separated from the genes  
119 that are highly expressed in non-invasive tissue on PC1 (Fig. 1A, B). To identify the  
120 genes that might be involved in haustorium development, we performed clustering  
121 analysis using self-organizing maps (SOM) in R and identified a cluster enriched with  
122 genes that are highly expressed in both prehaustoria and haustoria tissues (SOM9 - Fig. 1,  
123 Supplemental Fig. 2 and 3).

124 We focused on the genes contained in this SOM9 cluster and constructed a gene  
125 coexpression network (GCN). Using the fast greedy modularity optimization algorithm to  
126 analyze the GCN community structure (Clauset et al., 2004) and visualizing the network  
127 using Cytoscape (Cline et al., 2007), we noticed this SOM9 GCN is composed of three  
128 major modules (Fig. 2A). Since the current gene annotation of *C. campestris* genome is  
129 not as complete as that of most model organisms, we used BLAST to combine our



130 previously annotated transcriptome with current *C. campestris* genome gene IDs  
131 (Supplementary Table 1). With this more comprehensive annotation profile, we further  
132 conducted GO enrichment analysis using the TAIR ID for each *C. campestris* gene in the  
133 network to identify the major GO term for each module. Based on our GO enrichment  
134 results, the major biological process of module 1 can be classified as “plant-type cell wall  
135 loosening” and the cellular component of module 1 is “extracellular region and  
136 intracellular membrane-bounded organelle” (Fig. 2A, B). This result indicates the genes  
137 contained in module 1 are mostly involved in cell wall loosening, which is needed for the  
138 haustorium to penetrate through the host tissue. On the other hand, the major biological  
139 processes of module 3 are “transport, response to hormones, secondary metabolite  
140 biosynthetic process, and regulation of lignin biosynthetic process”. The molecular  
141 function of module 3 is “transmembrane transporter activity” and the cellular component  
142 of module 3 is “plasma membrane” (Fig. 2A). This analysis suggests that these genes  
143 might be involved in later stages of development and nutrient transport from the host to  
144 the parasite once a connection is established between the host and the parasite.

145 To identify the key regulators in the haustorium penetration process, we focused  
146 on genes in module 1 and calculated the degree centrality and betweenness centrality  
147 scores of each gene within this group. Many central hub genes in module 1 are proteins  
148 or enzymes involved in cell wall modifications, like pectin lyases, pectinesterase  
149 inhibitors, and expansins (Fig. 2B). To find the upstream regulators of these pathways,  
150 we focused on transcription factors that are classified in module 1. Intriguingly, only  
151 three transcription factors are included in module 1: *CcLBD25* (Lateral Organ Boundaries  
152 Domain gene 25), *CcLBD4*, and *CcWRKY71* (Fig. 2B). According to the gene

153 coexpression network of SOM9, we noticed that *CcLBD25*, *CcLBD4*, and *CcWRKY71*  
154 share several common first layer of neighbors (Figure 2). Based on previous reports,  
155 *AtLBD25* regulates lateral root development in *Arabidopsis* by promoting auxin signaling  
156 (Dean et al., 2004; Mangeon et al., 2010). Furthermore, an *LBD25* orthologue (*TcLBD25*)  
157 in *Thesium chinense*, a root parasitic plant in the Santalaceae family, was also detected to  
158 be upregulated during the haustorium development process (Ichihashi et al., 2017). With  
159 these serendipitous pieces of evidence, we suspected that *CcLBD25* may regulate  
160 haustorium formation and the parasitism process in *C. campestris*.

161 To understand the role of *CcLBD25* and the potential connection with other  
162 genes, we included genes in SOM2 (genes that are only highly expressed in haustoria)  
163 and SOM3 (genes that are only highly expressed in prehaustoria) to build a more  
164 comprehensive GCN (Fig. 1, Supplemental Fig. 2 and 3). Based on the community  
165 structure analysis, this comprehensive network is composed of three major modules (Fig.  
166 3A). Based on our GO enrichment results, the major biological process of module 3 is  
167 plant-type cell wall loosening and the major biological processes of module 1 are  
168 morphogenesis of a branching structure, plant organ formation, and several hormone  
169 responses and biosynthetic processes. *CcLBD25* itself is placed in module 1, but  
170 *CcLBD25* has many first layer connection with genes that are classified in module 1 or  
171 module 3 (Fig. 3A, C). This result indicates that *CcLBD25* might play a role in  
172 connecting genes involved in different pathways or aspects of haustorium development.  
173 Furthermore, by coloring the network with their corresponding SOM groups, we noticed  
174 that even though *CcLBD25* itself is in SOM9, many of the *CcLBD25* first and second  
175 layers of neighbors are in SOM2 and SOM3 (Fig. 3B, D). Thus, *CcLBD25* might be a key

176 regulator of the haustorium development process in both early and late stages of  
177 haustorium development, and may also play a critical role in coordinating the function of  
178 genes that are only expressed in discrete developmental stages.

179

## 180 **Zooming into tissue specific expression using laser-capture microdissection (LCM)**

### 181 **coupled with RNA-seq**

182 Our first transcriptome data came from hand collected tissue samples. To further dissect  
183 *Cuscuta* haustorium developmental stages, we used laser-capture microdissection (LCM)  
184 with RNA-seq to analyze only pure haustorial tissues from three different haustorium  
185 developmental stages (Supplemental Fig. 4). Based on a previous study, changes in the  
186 levels of jasmonic acid (JA) and salicylic acid (SA) are observed about 36-48 hours after  
187 first haustorial swelling, which is about 4 days post attachment (DPA) (Runyon et al.,  
188 2010). We also noticed that haustorium growth is a continuous process on *C. campestris*,  
189 so all developmental stages of haustoria can be found on the same strand at the 4 DPA  
190 time point. Therefore, we focused on 4 DPA and defined three developmental stages  
191 based on their haustorium structure: early (the haustorium has just contacted the host),  
192 intermediate (the haustorium has developed searching hyphae but has not formed  
193 vascular connections), and mature (a mature haustorium with continuous vasculature  
194 between host and parasite) (Supplemental Fig. 4). *C. campestris* haustorium tissues were  
195 collected using LCM at these three developmental stages from *C. campestris* attached on  
196 H1706 and subjected to RNA-Seq (Supplemental Fig. 4).

197 Next, we mapped our LCM RNA-Seq data to the *C. campestris* genome.

198 Visualizing the gene expression changes using multidimensional scaling showed that the

199 expression profile of the mature-stage is distinct from the early and intermediate stages  
200 (Supplemental Fig. 5). We then conducted clustering analyses using SOM to group genes  
201 based on their expression patterns at these three different developmental stages (Fig. 4).  
202 According to our PCA analysis, PC1 obviously separated genes that are specifically  
203 expressed in the mature-stage from those expressed in the other two stages, and PC2  
204 distinguished the genes expressed in early stage from intermediate stage (Supplemental  
205 Fig. 6). Interestingly, and similar to what was seen in our tissue type transcriptome data,  
206 *CcLBD25* is grouped in SOM6, which is the cluster of genes that are relatively highly  
207 expressed in both early-stage and mature-stage (Fig. 4A, B, and Supplemental Fig. 7). To  
208 investigate gene regulatory dynamics within the haustorium developmental process, we  
209 used the same gene list from tissue type RNA-Seq SOM9 and constructed a new GCN of  
210 these genes based on the LCM RNA-Seq expression profiles (Fig. 4C). By using the  
211 same gene list, but the expression dataset from samples of precisely collected haustorial  
212 cells, we obtained more detailed regulatory connections between genes by comparing the  
213 tissue type GCN and LCM GCN (Fig. 2A, 4C). Based on the fast greedy community  
214 structure analysis, this LCM GCN is composed of three major modules and *CcLBD25* is  
215 in module 1 (Fig. 4C). According to our GO enrichment results, the major biological  
216 process for module 1 is plant-type cell wall loosening and for module 3 is brassinosteroid  
217 mediated signaling pathway (Fig. 4C). In addition to cell wall loosening related enzyme  
218 encoding genes forming central hubs, we noticed *CcLBD25* is the TF with the highest  
219 connection in module 1 and has many connections with cell wall loosening-related genes  
220 (Fig. 4C, D). Zooming in to focus on *CcLBD25*, we noticed that the *CcLBD25* first and  
221 second layers of neighbors are genes classified in module 1 or module 3, indicating that

222 *CcLBD25* might play a role in connecting these two pathways. Many of the *CcLBD25*  
223 first and second layers of neighbors are pectin degradation related genes, like *PL* and  
224 *PMEI*. On the other hand, *CcLBD4* is not in the LCM GCN and *CcWRKY71* is at a  
225 marginal location with only one connection. This result provided further support for our  
226 hypothesis that *CcLBD25* is the major TF regulating cell wall modification in the  
227 haustorium penetration process. *CcLBD4* and *CcWRKY71* might also be key regulators,  
228 but are likely involved in a different aspect of haustorium development. Thus, we focused  
229 our attention on understanding the function of *CcLBD25* in haustorium development.

230

231 **Cross-species RNAi (Host-Induced Gene Silencing) *CcLBD25* effects whole-plant**  
232 **phenotypes and reduces the parasite fitness**

233 In our previous studies, we found cross-species transport of mRNAs and siRNAs  
234 between *C. campestris* and their hosts, and demonstrated host-induced gene silencing  
235 (HIGS) (Runo et al., 2011; Alakonya et al., 2012). Many previous studies have also  
236 shown that large-scale mRNA and small RNAs are transported through the haustorium  
237 connections in *Cuscuta* species (Kim et al., 2014; Johnson et al., 2019). Therefore, we  
238 generated transgenic host tomato with hairpin RNAs that target and down-regulate  
239 *CcLBD25* after the parasite forms the first attachment and takes up RNAs from the host  
240 (Supplemental Fig. 8). When *C. campestris* grows on wild-type tomato hosts, *CcLBD25*  
241 is highly expressed in invasive tissues (Fig. 5A, B). However, *CcLBD25* expression  
242 levels are significantly knocked-down in the tissues on and near the attachment sites of *C.*  
243 *campestris* plants that are growing on *CcLBD25* RNAi transgenic plants (Fig. 5B). If  
244 *CcLBD25* is important in haustorium development and parasitism, then down-regulating

245 *CcLBD25* should influence haustorium structure or formation and might also affect  
246 nutrient transport. To verify our hypothesis, we measured flowering time in *C. campestris*  
247 growing on various tomato hosts. The result showed that parasites growing on *CcLBD25*  
248 RNAi transgenic tomatoes transitioned to the flowering stage and subsequently senesced  
249 earlier than those growing on wild types (Fig. 5C). Based on previous studies, many plant  
250 species respond to environmental stress factors by inducing flowering (Wada and  
251 Takeno, 2010; Riboni et al., 2014). This early transition to the reproductive stage and  
252 senescence in *C. campestris* grown on *CcLBD25* RNAi plants suggests that *C. campestris*  
253 was growing under stress likely because of nutrient deficiency.

254 To verify if down-regulating *CcLBD25* affects the ability of the parasite to  
255 acquire resources from the host, we also measured the biomass of *C. campestris* grown  
256 on wild-type H1706 and *CcLBD25* RNAi transgenic plants. At 14 days post attachment  
257 (DPA), we noticed that *C. campestris* plants grown on *CcLBD25* RNAi transgenic  
258 tomatoes have less biomass compared with the *C. campestris* plants grown on wild-type  
259 H1706 (Fig. 5D). Both whole-plant level phenotypes suggest that *CcLBD25* might be  
260 involved in haustorium development and knocking down the expression level of  
261 *CcLBD25* influences the ability of *C. campestris* to establish connections with hosts and  
262 interferes with parasite nutrient acquisition.

263

#### 264 **Down-regulation of *CcLBD25* leads to structural changes in haustoria**

265 To verify the crucial role *CcLBD25* plays in haustorium development and to  
266 investigate how down-regulating *CcLBD25* affects haustorium structure and the  
267 parasitism process, we prepared 100  $\mu\text{m}$  thick fresh haustorium sections using a

268 vibratome and stained them with Toluidine Blue O (O'Brien et al., 1964). In wild-type  
269 haustorium sections, we could observe searching hyphae penetrate the host cortex region  
270 and transform into xylem or phloem hyphae as they connected to host xylem and phloem  
271 (Fig. 6A, C, E). However, we observed that many haustoria growing on *CcLBD25* RNAi  
272 transgenic tomatoes form a dome shape structure and lack searching hyphae (Fig. 6B, D,  
273 F, and Supplemental Fig. 9). This result indicates that *CcLBD25* might be involved in  
274 searching hyphae development. Therefore, knocking down of *CcLBD25* affects the  
275 ability of *C. campestris* to establish connections with the host vascular system and leads  
276 to nutrient deficiency as observed in the whole-plant level phenotypes.

277 We also noticed the down-regulation of *CcLBD25* influenced the parasite  
278 penetration process. Fresh tissue sections of the haustoria growing on wild types showed  
279 a clear zone in tomato cortex tissues near haustorium tissues (Fig. 6A, C, E). Since the  
280 metachromatic staining of Toluidine Blue O is based on cell wall composition and pH  
281 values and a pink to purple color indicates pectin presence, this result indicates that the  
282 pectins in tomato cortex tissues may have been digested or the pH condition in the cell  
283 wall has been changed in the haustorium penetrating process (Fig. 6A, C, E). On the  
284 other hand, the *C. campestris* growing on *CcLBD25* RNAi transgenic tomatoes still  
285 showed pink to purple color in the cortex near the haustorium attachment sites (Fig. 6B,  
286 D). Hence, less pectin digestion or cell wall modification happened in tomato cortex  
287 tissues near these *CcLBD25* downregulated haustorium tissues compared to the haustoria  
288 growing on wild-type. These haustorium structural phenotypes correlate well with our  
289 SOM9 GCN from the *C. campestris* tissue transcriptome. *CcLBD25* is one of the  
290 transcription factor central hub genes in module 1 with many first and second layers of

291 connection with genes involved in cell wall modification, including pectin lyases and  
292 pectin methyl-esterase inhibitors (PMEIs). Based on many previous studies, the interplay  
293 between pectin methylesterase (PME) and PMEI is an important determinant of cell wall  
294 loosening, strengthening, and organ formation (Wormit and Usadel, 2018). Therefore, we  
295 hypothesized that PMEIs might be one of the key regulators that cause the haustorium  
296 phenotype in *CcLBD25* downregulated haustorium tissues. To test if the down-regulation  
297 of *CcLBD25* would affect *PMEI* expression levels, we conducted qPCR to detect  
298 *CcPMEI* expression levels in the tissues of *C. campestris* plants that are growing on  
299 *CcLBD25* RNAi transgenic plants. Our results show that *CcPMEI* expression levels are  
300 also significantly reduced when *CcLBD25* is knocked-down (Fig. 6G, H). Thus *CcLBD25*  
301 might directly or indirectly regulate *CcPMEI* at the transcriptional level. These results  
302 verify the hypothesis that *CcLBD25* plays an important role in haustorium development  
303 and might regulate cell wall modification.

304

305 **Investigating the impact of *CcLBD25* on early-stage haustorium development using**  
306 **an *in vitro* haustoria (IVH) system**

307 Previous studies indicate that several auxin-inducible *LBD* genes function in lateral root  
308 initiation (Goh et al., 2012). We noticed that auxin efflux carriers and auxin-responsive  
309 genes are also in the SOM9 gene co-expression network (Fig. 2). Therefore, we proposed  
310 that *CcLBD25* might regulate early-stage haustorium development in *C. campestris*. In  
311 order to assay the role of *CcLBD25* in *C. campestris* haustorium initiation, we developed  
312 an *in vitro* haustorium (IVH) system coupled with HIGS (Fig. 7A). This method is  
313 inspired by the previous discovery that *Cuscuta* haustoria can be induced by physical



314 contact and far-red light signals (Tada et al., 1996) and many studies confirmed that small  
315 RNAs and mRNAs can move cross species through haustorial phloem connection  
316 (David-Schwartz et al., 2008; Alakonya et al., 2012; Kim et al., 2014; Johnson et al.,  
317 2019). Therefore, we took the *C. campestris* strands near the haustorium attachment sites  
318 growing on wild-type and *CcLBD25 RNAi* transgenic tomato (Fig. 7B) and sandwiched  
319 these strands in between two layers of agar to provide sufficient physical contact signals  
320 (Fig. 7A, C). We then illuminated these plates under far-light for 5 days at which point  
321 prehaustoria are readily visible (Fig. 7D, E). Since the IVH induction is rapid and these  
322 prehaustoria can be easily separated from the agar, this method allowed us to count  
323 prehaustoria numbers under the microscope and validate the effect of *CcLBD25 RNAi* on  
324 haustorium initiation. The strands from the *C. campestris* grown on *CcLBD25 RNAi*  
325 transgenic tomatoes produced many fewer prehaustoria than the strands from those  
326 grown on wild types (Fig. 7F). This result indicates that reduced *CcLBD25* expression  
327 impeded haustorium initiation and confirms that *CcLBD25* is a key regulator of early-  
328 stage haustorium development, as suggested by our LCM RNA-Seq analysis results.  
329

330

## 331 **Discussion**

332 In this study, we demonstrate that *CcLBD25* is a crucial regulator of several aspects of *C.*  
333 *campestris* haustorium development, including haustorium initiation, cell-wall loosening,  
334 and searching hyphae growth. We use transcriptome of six *C. campestris* tissue types and  
335 RNA-Seq data of LCM captured haustoria at three developmental stages to reveal the  
336 potential molecular mechanisms and the complexity of gene networks during the  
337 haustorium formation process. Our results provide a more comprehensive analysis of the  
338 *CcLBD25* centered regulatory system and illustrate that *CcLBD25* might directly or  
339 indirectly coordinate different groups of genes that are expressed only at the early or  
340 mature stage during haustorium development.

## 341 **Lateral root development and haustorium development**

342 In non-parasitic plants, like Arabidopsis, *AtLBD25* was also named *DOWN IN DARK*  
343 *AND AUXINI (DDAI)* because *lbd25* mutant plants showed reduced sensitivity to auxin  
344 and reduced number of lateral roots (Mangeon et al., 2010). These phenotypes indicate  
345 that *AtLBD25* functions in lateral root formation by promoting auxin signaling (Mangeon  
346 et al., 2010). In the root parasitic plant, *Thesium chinense*, *TcLBD25* was highly  
347 expressed during haustorium formation (Ichihashi et al., 2017). This supports the  
348 hypothesis that root parasitic plants co-opted the lateral root formation machinery into  
349 haustorium organogenesis. However, whether rootless stem parasitic plants *Cuscuta* spp.  
350 also followed the same path to generating haustoria was unknown. In this study, we  
351 identified *CcLBD25* as playing a key role in *Cuscuta* haustorium development. Our  
352 SOM9 gene co-expression network shows that auxin efflux carriers and auxin-responsive

353 genes are also connected with *CcLBD25* (Fig. 2). These pieces of evidence suggest that  
354 *Cuscuta* spp. adopted not only the shoot developmental programs (Alakonya et al., 2012)  
355 but also the lateral root programming system into haustorium organogenesis.

### 356 **Searching hyphae development**

357 Down-regulating *CcLBD25* reduced searching hyphae formation (Fig. 6B, D, F),  
358 indicating that *CcLBD25* is involved in searching hyphae development. Surprisingly,  
359 *AtLBD25* is not only expressed in roots but also expressed in pollen (Mangeon et al.,  
360 2010). Previous reports indicate that *AtLBD25* is especially highly expressed during the  
361 pollen late developmental stage (Kim et al., 2016). Intriguingly, many genes that are  
362 involved in haustoria development also play important roles in flower and pollen  
363 development (Yang et al., 2015; Yoshida et al., 2019). Recent research on haustoria 3D  
364 structure also indicates that the growth pattern of intrusive cells is similar to the rapid  
365 polar growth of pollen tubes (Masumoto et al., 2020). Taken together with our results in  
366 this study and previous findings in other organisms, we suggest that the genes that are  
367 regulating pollen development or pollen tube growth, like *LBD25*, might be adopted by  
368 parasitic plants for haustorium intrusive cell and searching hyphae development. This  
369 discovery also confirmed the hypothesis that parasitic plants co-opted the developmental  
370 reprogramming process from multiple sources instead of just a single organ.

### 371 **Cell adhesion and cell wall loosening in parasitism**

372 The mechanical properties and chemical conditions of cell walls have been reported to be  
373 critical for regulating plant organ morphogenesis (Chebli and Geitmann, 2017; Zhao et  
374 al., 2018). By remodeling cell wall composition or extracellular environments, plants  
375 generate local cell wall loosening and strengthening, which allows anisotropic growth

376 processes to occur (Chebli and Geitmann, 2017). Recent studies also indicate that the  
377 interaction between pectin and other cell wall components is an important determinant for  
378 plant organogenesis (Chebli and Geitmann, 2017; Saffer, 2018) and the interplay between  
379 PME and PMEI plays a vital role in regulating physical properties of the cell wall  
380 (Wormit and Usadel, 2018). In the root parasitic plant, *Orobanche cumana*, a PME is  
381 shown to be present at the host and parasite interface and have pectolytic activity  
382 (Losner-Goshen et al., 1998). These results suggest that parasitic plants produce PME to  
383 degrade pectin in the host cell wall and help with haustorium penetration. Our SOM9  
384 GCNs shows that *CcLBD25* is co-expressed with many pectin lyases and PMEIs (Fig.  
385 2B, 3C, 3D, 4C, 4D), implying that *CcLBD25* might be the key transcription factor  
386 regulating expression of the enzymes involved in pectin remodeling. The haustoria grown  
387 on *CcLBD25* RNAi transgenic plants failed to penetrate host tissues and were unable to  
388 create a clear zone at the host and parasite interface (Fig. 6A-F), supporting the tight  
389 connection between *CcLBD25* and pectin-modifying enzymes. *CcLBD25* and PMEIs co-  
390 expressed in the mature stage of haustorium (Fig. 4C-D), when cell wall loosening occurs  
391 for haustorium penetration.

392 On the other hand, since the patterns of de-methylesterification on homogalacturonans  
393 (HG) determines cell wall loosening or strengthening, pectin properties also play a role in  
394 cell adhesion, which is regulated by PME and PMEI (Wormit and Usadel, 2018).  
395 Previous studies also indicate that *Cuscuta* spp. secrete pectin-rich adhesive materials to  
396 help with adhesion and allow attachment to their hosts (Vaughn, 2002; Shimizu and  
397 Aoki, 2019). This is consistent with our discovery that both *CcLBD25* and *PMEIs* are

398 highly expressed in the early stage of haustorium development, which would be  
399 responsible for the adhesion process in *C. campestris* (Fig. 4C-D).

400 **Conclusions**

401 Our detailed bioinformatic analysis on previously published *C. campestris* tissue type  
402 transcriptome coupled with LCM of RNA-Seq data from three haustorium developmental  
403 stages helped us hone in on the molecular mechanism of parasitic plant haustorium  
404 development. The discovery that *CcLBD25* plays a pivotal role in many aspects of  
405 haustorium formation shows that the regulatory machinery of haustorium development is  
406 potentially shared by both root and stem parasites. Although previous studies have  
407 indicated that parasitic plants evolved independently in about 13 different families, this  
408 conserved molecular mechanism supports the hypothesis that stem parasitic plants also  
409 adopted the programming of lateral root formation in non-parasitic plants into haustorium  
410 development. The results of this study not only provide an insight into molecular  
411 mechanisms by which LBD25 may regulate parasitic plant haustorium development but  
412 also raise potential for developing a universal parasitic weed-resistant crop that can  
413 defend both stem and root parasitic plants at the same time.

414

## 415 **Materials and Methods**

### 416 **Cuscuta campestris materials**

417 We thank W. Thomas Lanini for providing dodder seeds collected from tomato  
418 field in California. These dodder materials were previously identified as *Cuscuta*  
419 *pentagona* (Yaakov et al., 2001), a closely related species to *Cuscuta campestris* (Costea  
420 et al., 2015). We use molecular phylogenetics of plastid *trnL-F* intron/spacer region,  
421 plastid ribulose-1,5-bisphosphate carboxylase/oxygenase large subunit (*rbcL*), nuclear  
422 internal transcribed spacer (*nrITS*), and nuclear large-subunit ribosomal DNA (*nrLSU*)  
423 sequences (Stefanović et al., 2007; García et al., 2014; Costea et al., 2015) to verify our  
424 dodder isolate is the same as *Cuscuta campestris* 201, Rose 46281 (WTU) from USA,  
425 CA (Jhu et al., 2020) by comparing with published sequences (Costea et al., 2015).

### 426 **RNA-Seq data mapping and processing**

427 For *C. campestris* tissue type RNA-Seq analysis, we used the raw data previously  
428 published (Ranjan et al., 2014). This RNA-Seq data contain six different *C. campestris*  
429 tissues, including seeds, seedlings, stems, prehaustoria, haustoria, and flowers, grown on  
430 the tomato (*Solanum lycoperscum*) Heinz 1706 (H1706) cultivar and *Nicotiana*  
431 *benthamiana* (*N. benthamiana*). We mapped both *C. campestris* tissue type and LCM  
432 RNA-Seq data to the genome of *C. campestris* (Vogel et al., 2018) with Bowtie 2  
433 (Langmead and Salzberg, 2012) and used EdgeR (Robinson et al., 2009) to get  
434 normalized trimmed mean of M values (TMM) for further analysis.

### 435 **MDS and PCA with SOM Clustering**

436 After normalization steps, we used *cmdscale* in R stats package to create  
437 multidimensional scaling (MDS) data matrix and then generate MDS plots. For *C.*



438 *campestris* tissue types RNA-Seq data, we selected genes with coefficient of variation >  
439 0.85 for PCA analysis. We calculated principal component values using `prcomp` function  
440 in R stats package. Selected genes are clustered for multilevel six-by-two hexagonal  
441 SOM using `som` function in the `kohonen` package (Wehrens and Buydens, 2007). We  
442 visualized the SOM clustering results in PCA plots. For *C. campestris* LCM RNA-Seq  
443 data, genes in the upper 50% quartile of coefficient of variation were selected for further  
444 analysis. Selected genes were then clustered for multilevel three-by-two hexagonal SOM.

#### 445 **Construct Gene coexpression networks**

446 We use the genes that are classified in selected SOM groups to build GCNs. The R script  
447 is modified from our previously published method (Ichihashi et al., 2014) and the  
448 updated script is uploaded to GitHub and included in code availability. The SOM9 GCNs  
449 for *C. campestris* tissue type data was constructed with normal quantile cutoff = 0.93.  
450 The SOM2+3+9 GCNs for *C. campestris* tissue type data was constructed with normal  
451 quantile cutoff = 0.94. For the GCN of *C. campestris* LCM data, we used the SOM9 gene  
452 list from tissue type RNA-Seq and construct the GCN of these genes based on the  
453 expression profiles in LCM RNA-Seq data with normal quantile cutoff = 0.94. These  
454 networks were then visualized using Cytoscape version 3.8.0.

#### 455 **Functional annotation and GO enrichment analysis of RNA-Seq data**

456 Since many genes are not functionally annotated in the recently published *C. campestris*  
457 genome (Vogel et al., 2018), we used BLASTN with  $1e^{-5}$  as an e-value threshold to  
458 compare our previously annotated transcriptome final contigs with current *C. campestris*  
459 genome genes and only keep the top 1 scored hits for each gene (Supplementary Table 1).  
460 After we obtain this master list, we combined the functional annotation of our published

461 transcriptome based on NCBI nonredundant database and TAIR10 (Ranjan et al., 2014)  
462 with *C. campestris* genome gene IDs to create a more complete functional annotation  
463 (Supplementary Table 1). TAIR ID hits are used for GO Enrichment Analysis on  
464 <http://geneontology.org/> for gene clusters and modules.

#### 465 **LCM RNA-seq Library Preparation and Sequencing**

466 We infested about four-leaves-stage Heinz 1706 tomato plants with *C. campestris*  
467 strands. Tomato stems with haustoria are collected at 4 days post attachment (DPA) and  
468 fixed in formaldehyde – acetic acid – alcohol (FAA). These samples were dehydrated by  
469 the ethanol series and embedded in paraffin (Paraplast X-TRA, Thermo Fisher  
470 Scientific). We prepared 10 µm thick sections on a Leica RM2125RT rotary microtome.  
471 Tissue was processed within one month of fixation to ensure RNA quality. Haustorial  
472 tissues of the 3 defined developmental stages were dissected on a Leica LMD6000 Laser  
473 Microdissection System. Tissue was collected in lysis buffer from RNAqueous-Micro  
474 Total RNA Isolation Kit (Ambion) and stored at -80 °C. RNA was extracted using  
475 RNAqueous-Micro Total RNA Isolation Kit (Ambion) and amplified using WT-Ovation  
476 Pico RNA Amplification System (ver. 1.0, NuGEN Technologies Inc.) following  
477 manufacturer instructions. RNA-seq libraries for Illumina sequencing were constructed  
478 following a previously published method (Kumar et al., 2012) with slight modifications.  
479 Libraries were quantified, pooled to equal amounts, and their quality was checked on a  
480 Bioanalyzer 2100 (Agilent). Libraries were sequenced on a HiSeq2000 Illumina  
481 Sequencer at the Vincent J Coates Genomics Sequencing Laboratory at UC Berkeley.

#### 482 **CcLBD25 RNAi transgenic plants and HIGS efficiency verification**

483 We used pTKO2 vector (Snowden et al., 2005; Brendolise et al., 2017), which enables  
484 streamlined cloning by using two GATEWAY cassettes, positioned at opposite  
485 directions, separated by an Arabidopsis ACT2 intron and under the control of the 35S  
486 constitutive promoter. We have previously shown that producing the RNAi construct at  
487 phloem cells specifically using the SUC2 promoter was effective at dodder HIGS  
488 (Alakonya et al., 2012). Therefore, we replaced the 35S promoter with the SUC2  
489 promoter and generated pTKOS (Supplemental Fig. 8). We used BLAST to identify a  
490 292 bp fragment that was specific to *CcLBD25* and different from tomato genes. This  
491 RNAi fragment was amplified from *C. campestris* gDNA, TOPO cloned into pCR8/GW-  
492 TOPO (Life Technologies) and LR recombined into pTKO2 and pTKOS. These  
493 constructs were then sent to the UC Davis Plant Transformation Facility to generate  
494 *CcLBD25* RNAi transgenic tomato plants.

495 All T0 transgenic plants were selected by kanamycin resistance and their gDNAs were  
496 extracted and PCR performed to verify they have *CcLBD25* RNAi constructs. To validate  
497 HIGS efficiency and quantify the expression level of *CcLBD25* and *CcPMEI* in *C.*  
498 *campestris*, dodder tissues were harvested from both *C. campestris* grown on wild-type  
499 plants and T2 *CcLBD25* RNAi transgenic plants. We froze tissues in liquid nitrogen and  
500 ground them in extraction buffer using a bead beater (Mini Beadbeater 96; BioSpec  
501 Products). Following our previously published poly-A based RNA extraction method  
502 (Townesley et al., 2015), we obtained total mRNA from *C. campestris* and then used  
503 Superscript III reverse transcriptase (Invitrogen) for reverse transcription to synthesize  
504 cDNA as described by the manufacturer instructions. Real-time qPCR was performed

505 using a Bio-Rad iCycler iQ real-time thermal cycler with Bio-Rad IQ SYBR Green super  
506 mix.

### 507 **Whole-plant phenotype assays**

508 Based on previous studies, many plant species are reported to have early flowering  
509 phenotypes in response to environmental stresses (Wada and Takeno, 2010; Riboni et al.,  
510 2014). Therefore, we grew *C. campestris* on wild-type Heinz 1706 tomatoes and  
511 *CcLBD25* RNAi T1 transgenic tomato plants and then quantified how fast these *C.*  
512 *campestris* plants transition to their reproductive stage. The number of *C. campestris*  
513 plants that transitioned to the flowering stage were counted at 9, 10, 14 days post  
514 attachment (DPA) to test whether a stress-induced flowering phenotype could be  
515 observed.

516 To quantify the effect of *CcLBD25* downregulation on *C. campestris* growth, we infested  
517 3-weeks-old tomato plants with about 10 cm stem segments *C. campestris*, which  
518 originally are grown on wild-type H1706. We harvested all *C. campestris* tissues grown  
519 on wild-type H1706 and *CcLBD25* RNAi T2 transgenic plants at 14 DPA. These *C.*  
520 *campestris* tissues were then carefully separated from their host plant stems by hands and  
521 their fresh weights were measured using chemical weighing scales.

### 522 **in vitro haustoria (IVH) system**

523 Inspired by the previous discovery that *Cuscuta* haustoria can be induced by physical  
524 contact and far-red light signals (Tada et al., 1996), we developed an *in vitro* haustoria  
525 (IVH) system for haustorium induction without hosts. In this method, we detached  
526 *Cuscuta* stem segments that are right next to a stable haustorium attachment from the *C.*  
527 *campestris* grown on wild-type plants and T2 *CcLBD25* RNAi transgenic plants. *Cuscuta*

528 strands with shoot apices detached from a host plant are sandwiched between 3%  
529 Phytigel agar containing 0.5X Murashige and Skoog medium to provide tactile stimuli  
530 (Fig. 7A-C). These combined plates then irradiated with far-red light for two hours. After  
531 5 days of growth in darkness in a 22 °C growth chamber, prehaustoria are readily visible  
532 (Fig. 7D, E). We then counted the number of prehaustoria under a Zeiss SteREO  
533 Discovery, V12 microscope for quantification. Since the RNAi silencing signal is  
534 systemic (Alakonya et al., 2012; David-Schwartz et al., 2008) and IVH induction is rapid,  
535 we can validate the effect of *CcLBD25* RNAi on haustoria development.

### 536 **Fresh tissue sectioning and histology**

537 For fresh vibratome sections of haustoria attached to wild-type and *CcLBD25 RNAi* host  
538 stems, we collected samples and embedded them in 7% Plant Tissue Culture Agar. We  
539 then fixed these agar blocks in FAA (final concentration: 4% formaldehyde, 5% glacial  
540 acetic acid, and 50% ethanol) overnight, 50% ethanol for one hour, and then transferred  
541 to 70% ethanol for storage. These agar blocks were then sectioned using Lancer  
542 Vibratome Series 1000 to prepare 100 µm sections. We kept these sections in 4°C water  
543 and then conducted Toluidine Blue O Staining. We followed the published protocol  
544 (O'Brien et al., 1964) with some modifications. The sections were immersed in the stain  
545 for 30 seconds, and then washed them with water three times for 30 seconds each. After  
546 removing the agar from around the sections using forceps, we mounted the sections with  
547 water on a slide and imaged using a Zeiss SteREO Discovery, V12 microscope, and a  
548 Nikon Eclipse E600 microscope.

549

## 550 **Acknowledgements**

551 We are grateful to the UC Davis Plant Transformation Facility for generating *CcLBD25*  
552 RNAi transgenic tomato plants. We thank Kristina Zumstein for help in maintaining  
553 transgenic tomato seed stocks, and Richard Philbrook, Kaiwen Zhang, and Junqi Lu for  
554 helping with some parts of experiments and vibratome sectioning. We also thank Aaron  
555 Leichty, Steven Rowland and Karo Czarnecki for their input on bioinformatics analyses.

556 **Funding:** This work was funded by USDA-NIFA (2013-02345). M.-Y. J. was supported  
557 by Yen Chuang Taiwan Fellowship, Taiwan Government Scholarship (GSSA), Elsie  
558 Taylor Stocking Memorial Fellowship, Katherine Esau Summer Graduate Fellowship,  
559 Loomis Robert S. and Lois Ann Graduate Fellowship in Agronomy, and the UCD  
560 Graduate Research Award. Y. I. was supported by Grant-in-Aid for Young Scientists  
561 from the Ministry of Education, Culture, Sports, Science and Technology, Japan [B; grant  
562 no. 15K18589 to YI].

563 **Competing interests:** The authors declare that they have no competing interests.

## 564 **Code availability**

565 Updated R scripts for MDS, PCA and SOM analysis and gene coexpression network  
566 analysis are all deposited on GitHub (Link:  
567 [https://github.com/MinYaoJhu/CcLBD25\\_project.git](https://github.com/MinYaoJhu/CcLBD25_project.git)).

## 568 **Data availability**

569 All data is available in the main text or the supplementary materials. LCM RNA-Seq raw  
570 data are deposited on NCBI SRA PRJNA687611.

571 **Figures**

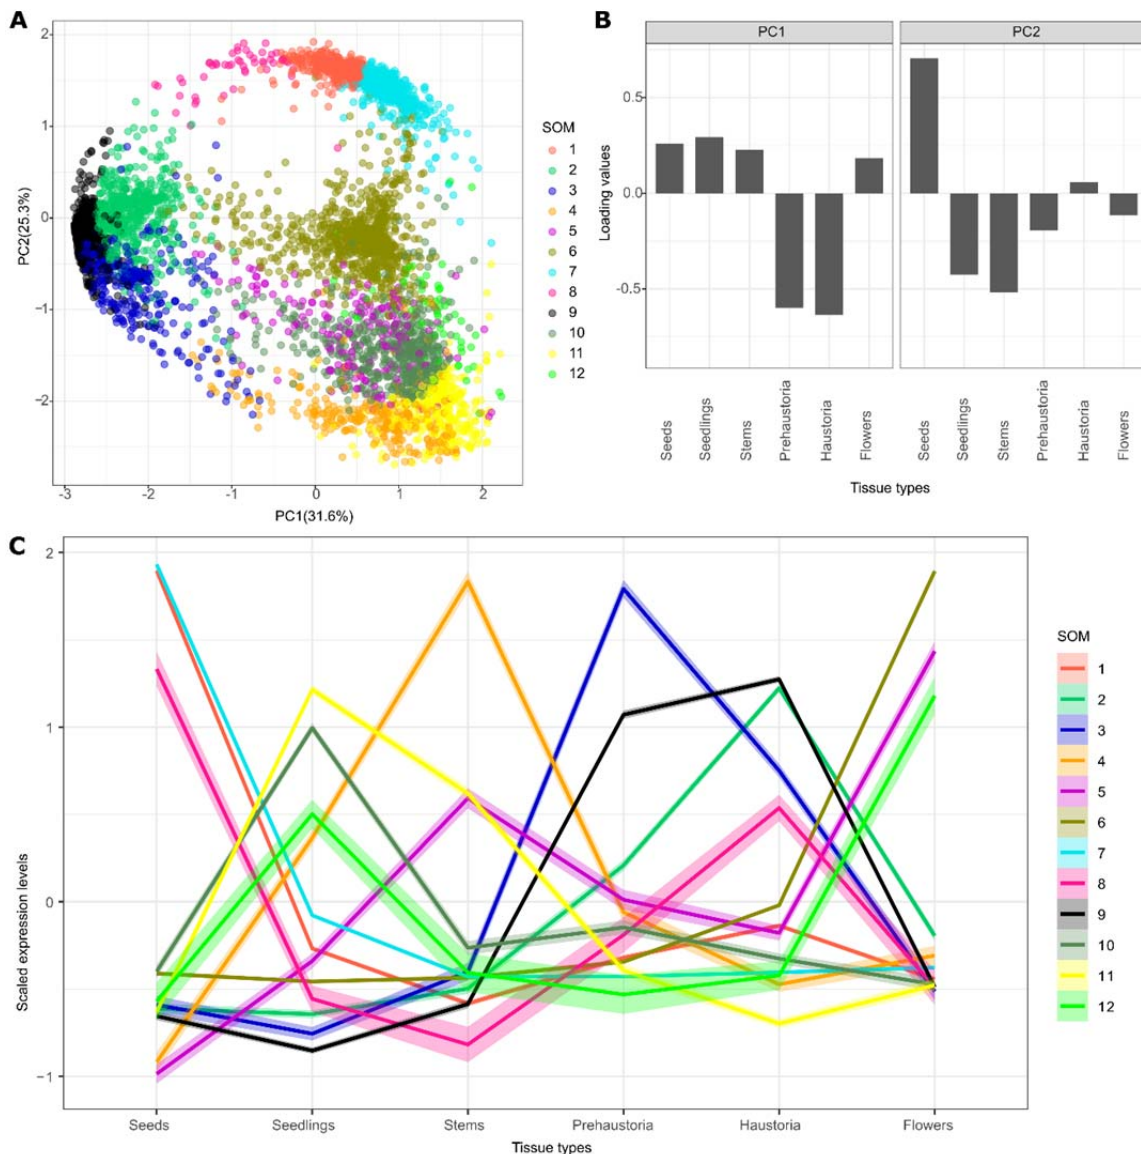

572  
573

**Figure 1.** PCA analysis with SOM clustering of gene expression in *C. campestris* tissue

574 type RNA-Seq data mapped to *C. campestris* genome. (A) PCA analysis based on gene

575 expression across different *C. campestris* tissues. Each dot represents a gene and is in the

576 color indicating their corresponding SOM group. (B) Loading values of PC1 and PC2.

577 PC1 separates the genes that are specifically expressed in intrusive tissues (prehaustoria

578 and haustoria) from those that are expressed in non-intrusive tissues. PC2 divides the

579 seed-specific gene from other genes. (C) Scaled expression levels of each SOM group  
580 across different *C. campestris* tissue types. Each line is colored based on corresponding  
581 SOM groups.

582



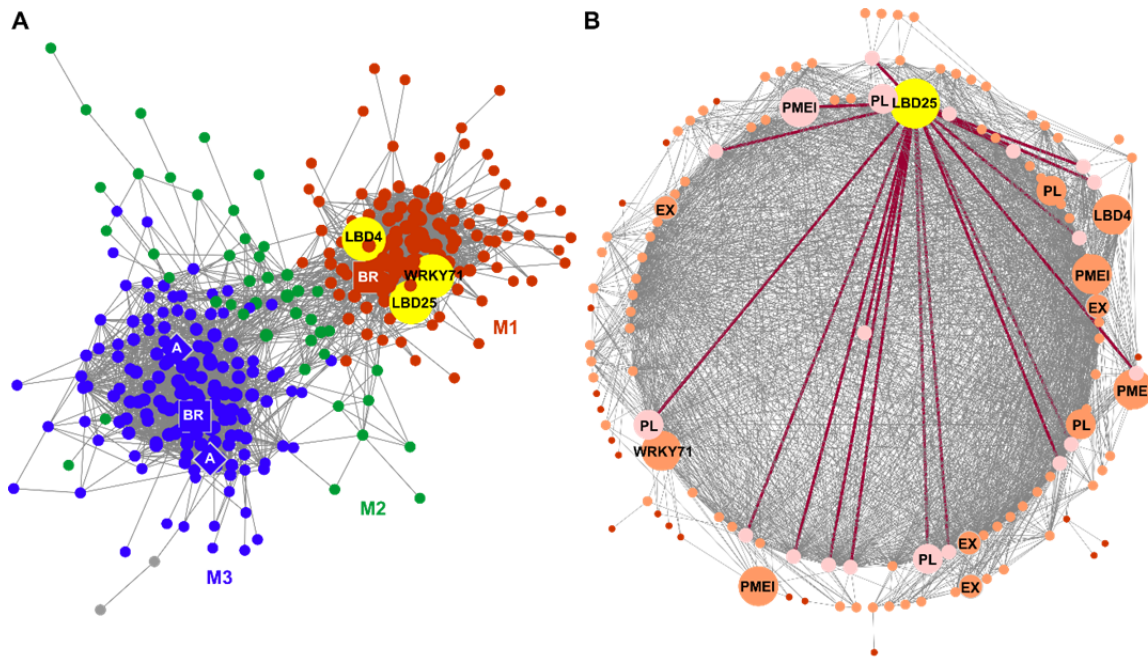

583

584 **Figure 2.** SOM9 gene-coexpression networks (GCNs) from *C. campestris* tissue type  
585 RNA-Seq data. (A) GCN of genes that are classified in SOM9, which includes genes that  
586 are highly expressed in both prehaustoria and haustoria. This SOM9 GCN is composed of  
587 three major modules. Red indicates genes in Module 1. Green indicates genes in Module  
588 2. Blue indicates genes in Module 3. The only three transcription factors (TFs) in module  
589 1 are labeled in yellow. (B) GCN of genes that are classified in SOM9 Module 1. Dark  
590 red lines indicate the connection between *CcLBD25* and its first layer of neighbors. The  
591 genes that are first layer neighbors of *CcLBD25* are labeled in pink. The genes that are  
592 second layer neighbors of *CcLBD25* are labeled in orange. The only three TFs and cell  
593 wall loosening related gene are highlighted and labeled in the network. (A, B) PL, pectin  
594 lyase. PME1, pectin methyl-esterase inhibitor. EX, expansin. A, auxin efflux carrier-like  
595 protein. BR, brassinosteroid insensitive 1-associated receptor kinase 1-like.

596

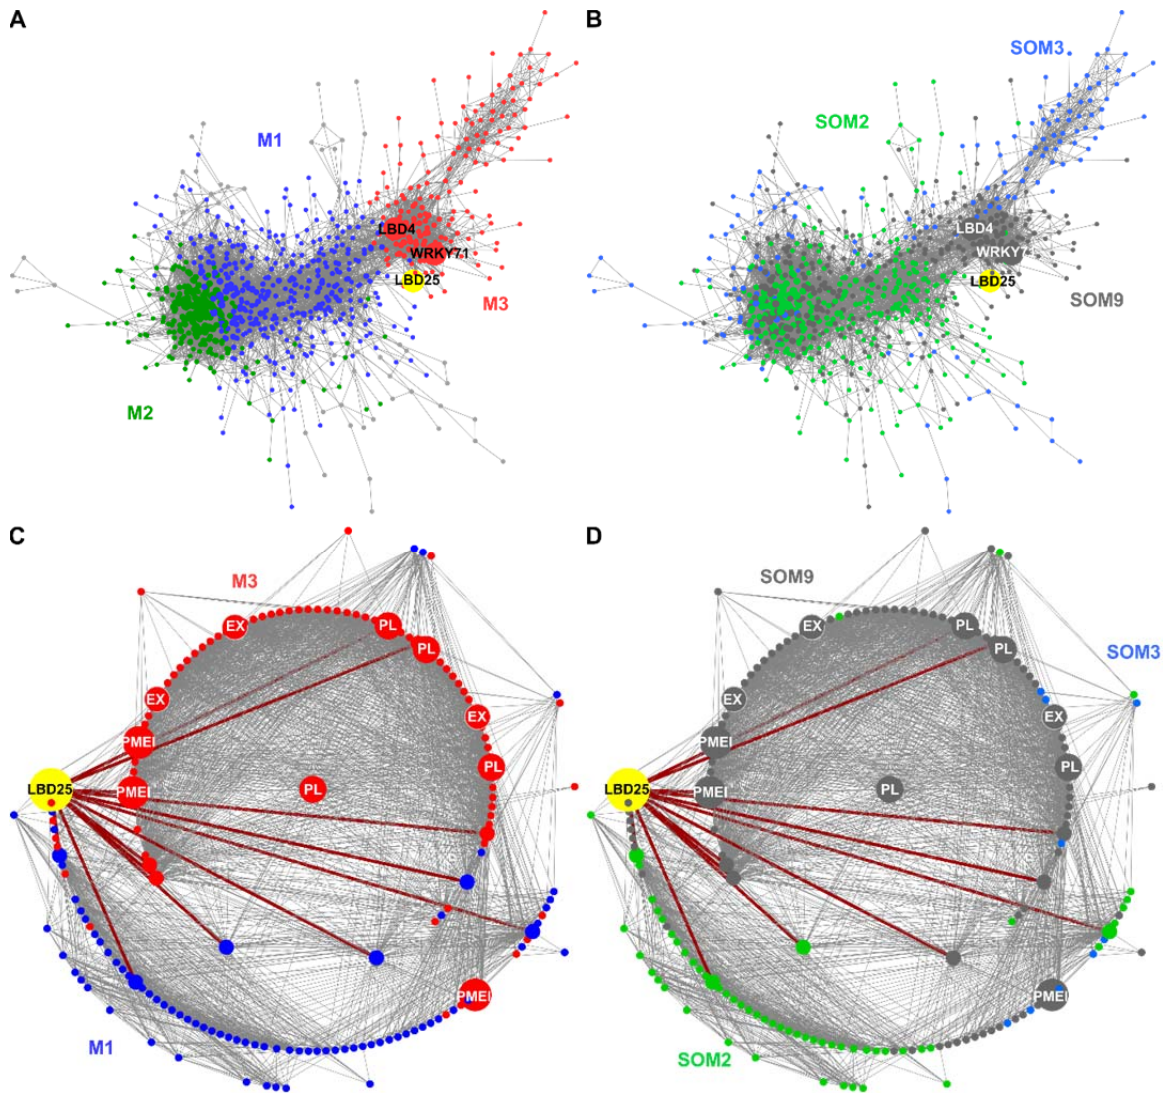

597

598 **Figure 3.** GCNs of SOM2, 3, 9 genes based on *C. campestris* tissue type RNA-Seq data.

599 (A) GCN of genes that are in SOM2, SOM3, and SOM9 with colors based on network

600 modules. This SOM2+SOM3+SOM9 GCN is composed of three major modules. Red

601 indicates genes in Module 1. Green indicates genes in Module 2. Blue indicates genes in

602 Module 3. (B) GCN of genes that are in SOM2, SOM3, and SOM9 with colors based on

603 SOM clustering groups. Green indicates genes in SOM2. Blue indicates genes in SOM3.

604 Grey indicates genes in SOM9. SOM2 includes genes that are only highly expressed in

605 haustoria and SOM3 includes genes that are only highly expressed in prehaustoria. (C)

606 GCN of *CcLBD25* and its first and second layer of neighbors with colors based on  
607 network modules. (D) GCN of *CcLBD25* and its first and second layer of neighbors with  
608 colors based on SOM clustering groups. (C, D) Red lines indicate the connection between  
609 *CcLBD25* and its first layer of neighbors. PL, pectin lyase. PMEI, pectin methyl-esterase  
610 inhibitor. EX, expansin.  
611

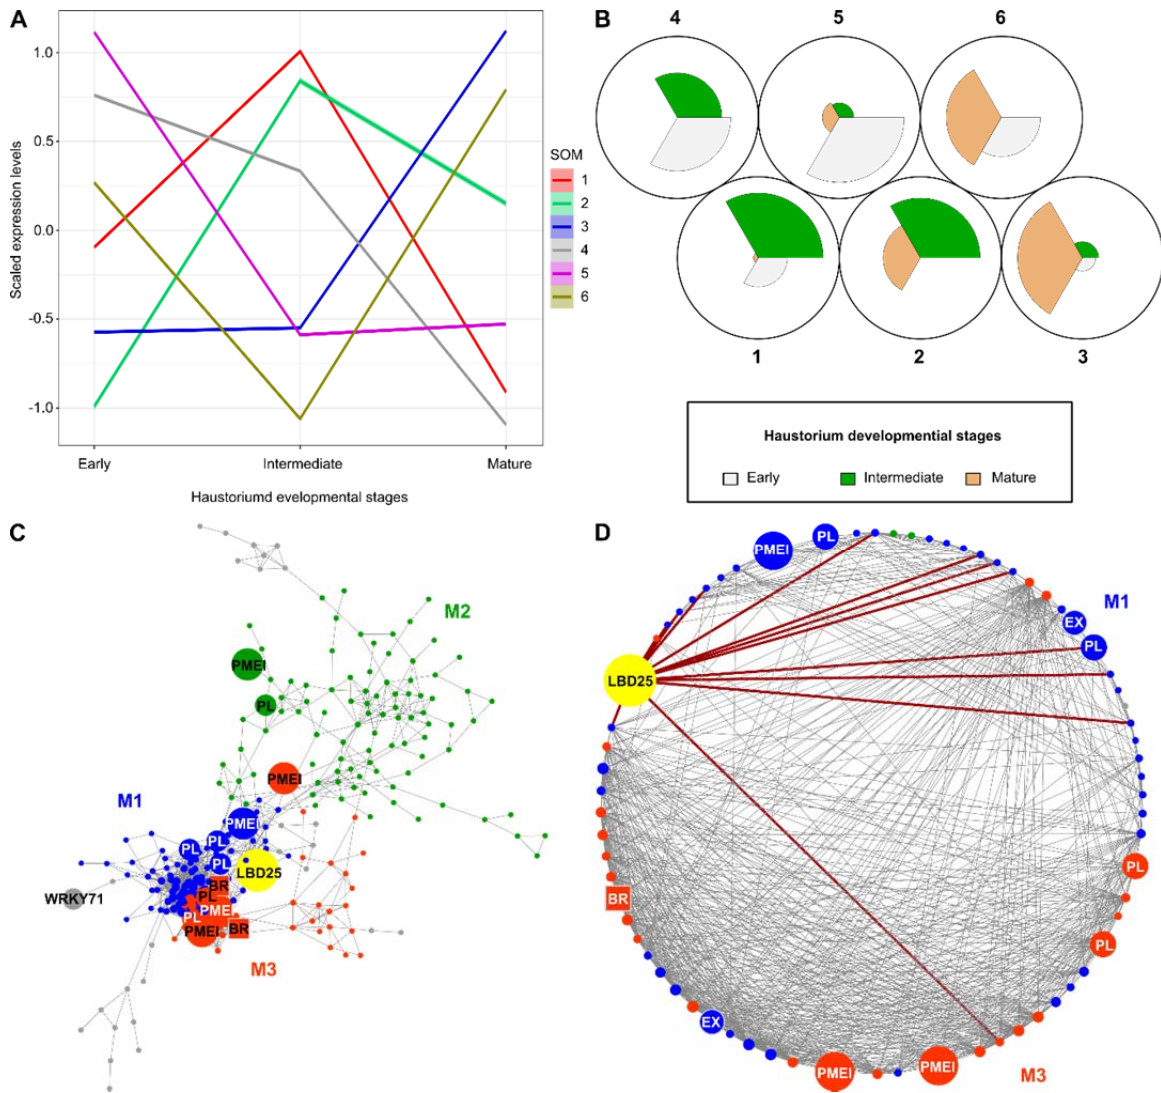

612

613 **Figure 4.** SOM clustering and GCNs of gene expression in *C. campestris* haustoria  
 614 across three developmental stages in LCM RNA-Seq data. (A) Scaled expression levels  
 615 of each SOM group across three haustorium developmental stages. Each line is colored  
 616 based on corresponding SOM groups. (B) A code plot of SOM clustering illustrating  
 617 which developmental stages are highly represented in each SOM group. Each sector  
 618 represents a developmental stage and is in the color indicating their corresponding  
 619 developmental stage. (C) GCN based on LCM RNA-Seq expression profiles with genes  
 620 in tissue type RNA-Seq SOM9. Blue indicates genes in Module 1. Green indicates genes

621 in Module 2. Red indicates genes in Module 3. Pectin degradation related gene are  
622 highlighted and labeled in the network. (D) GCN of *CcLBD25* and its first and second  
623 layer of neighbors with colors based on network modules. Dark red lines indicate the  
624 connection between *CcLBD25* and its first layer of neighbors. (C-D) PL, pectin lyase.  
625 PMEI, pectin methyl-esterase inhibitor. EX, expansin. BR, brassinosteroid insensitive 1-  
626 associated receptor kinase 1-like.

627



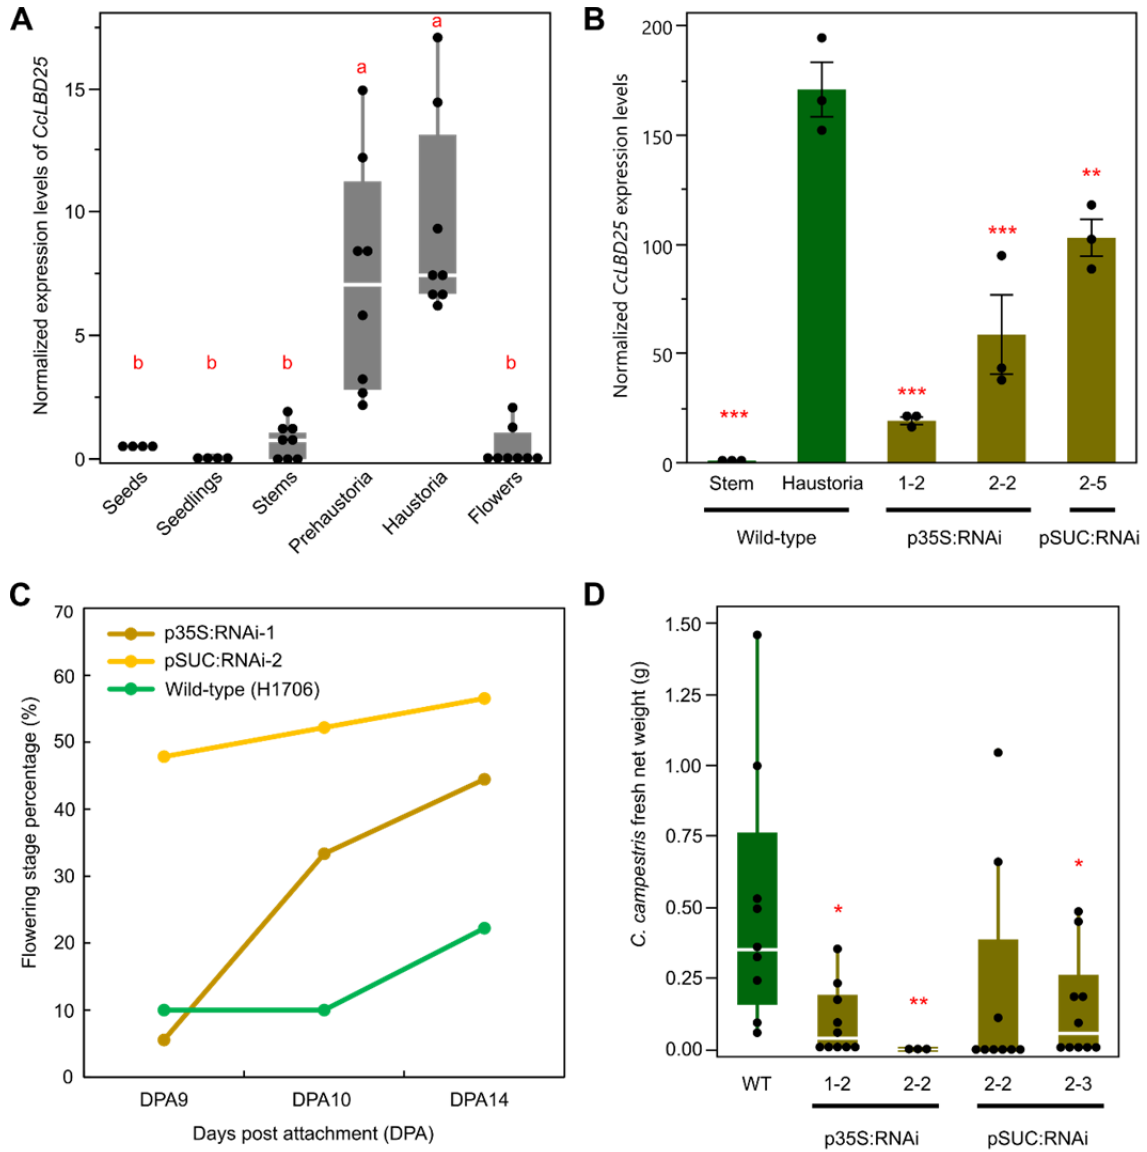

628

629 **Figure 5.** Gene expression levels and whole-plant phenotypes of *C. campestris* growing  
630 on Host-Induced Gene Silencing (HIGS) *CcLBD25* RNAi transgenic plants. (A) The  
631 normalized expression level of *CcLBD25* in six different tissue types of *C. campestris*  
632 from RNA-Seq data. Data presented are assessed using pair-wise comparisons with the  
633 Tukey test. P-value of the contrasts between “a” and “b” are less than 0.001. (B)  
634 Expression levels of *CcLBD25* in *C. campestris* haustoria grown on wild-type tomatoes  
635 and *CcLBD25* RNAi transgenic plants. Data presented are assessed using one-tailed  
636 Welch's t-test with wild-type haustoria as control. “\*” p-value < 0.05. “\*\*” p-value <  
637 0.01. “\*\*\*” p-value < 0.005. (C) The flowering time of *C. campestris* growing on wild-  
638 type tomatoes and *CcLBD25* RNAi transgenic plants. The early transition to the  
639 flowering stage indicates that *C. campestris* may be growing under stress conditions  
640 because they might not obtain sufficient nutrients from their host. DPA, day post  
641 attachment. (D) Biomass of *C. campestris* growing on wild-type tomatoes and *CcLBD25*  
642 RNAi transgenic plants. Fresh net weights of *C. campestris* were measured in gram (g).  
643 Data presented are assessed using one-tailed Welch's t-test with wild-type (WT) as  
644 control. “\*” p-value < 0.05. “\*\*\*” p-value < 0.01. (B, C, D) p35S:RNAi indicates the  
645 transgenic plants with the 35S promoter driving *CcLBD25* RNAi construct. pSUC:RNAi  
646 indicates the transgenic plants with the SUC2 promoter driving *CcLBD25* RNAi  
647 construct.  
648

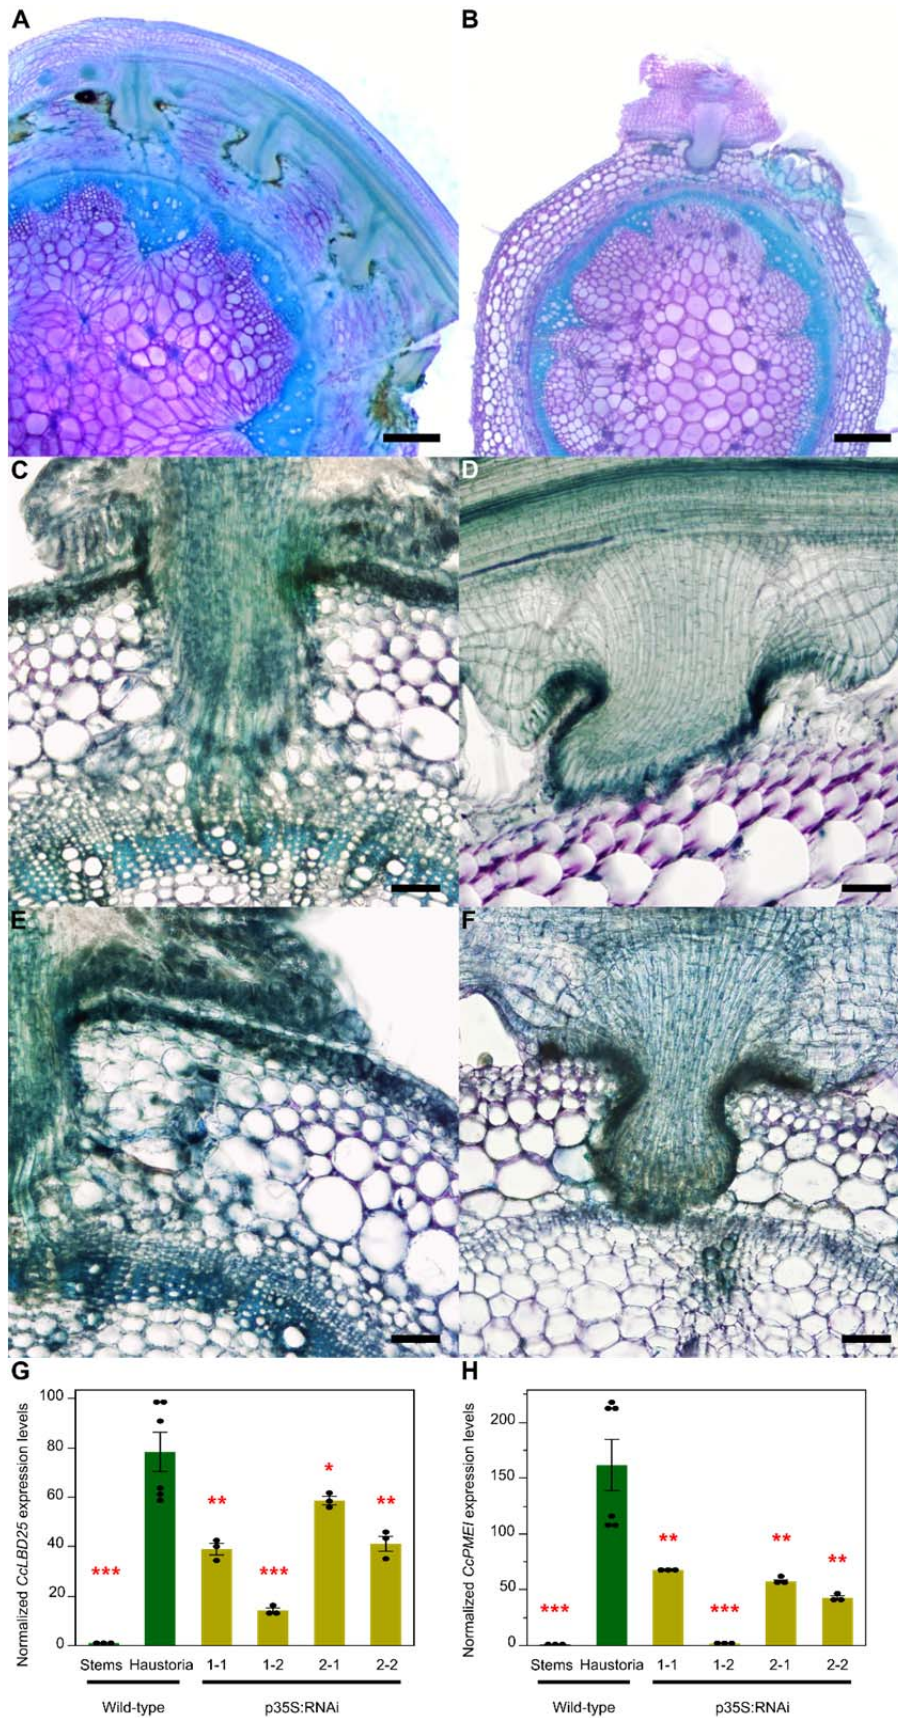

649



650 **Figure 6.** Haustorium phenotypes and gene expression levels of *C. campestris* growing  
651 on HIGS *CcLBD25* RNAi transgenic plants. (A, C, E) *C. campestris* haustoria growing  
652 on a wild-type H1706 host. (B, D, F) *C. campestris* haustoria growing on a *CcLBD25*  
653 RNAi transgenic tomato. (A, B) Scale bars = 500  $\mu\text{m}$ . (C, D, E, F) Scale bars = 100  $\mu\text{m}$ .  
654 (G, H) Expression levels of *CcLBD25* and *CcPMEI* in *C. campestris* haustoria grown on  
655 wild-type tomatoes and *CcLBD25* RNAi transgenic plants. Data presented are assessed  
656 using one-tailed Welch's t-test with wild-type haustoria as control. “\*” p-value < 0.05.  
657 “\*\*\*” p-value < 0.005. “\*\*\*\*” p-value < 0.001. p35S:RNAi indicates the transgenic plants  
658 with the 35S promoter driving *CcLBD25* RNAi construct.

659

660

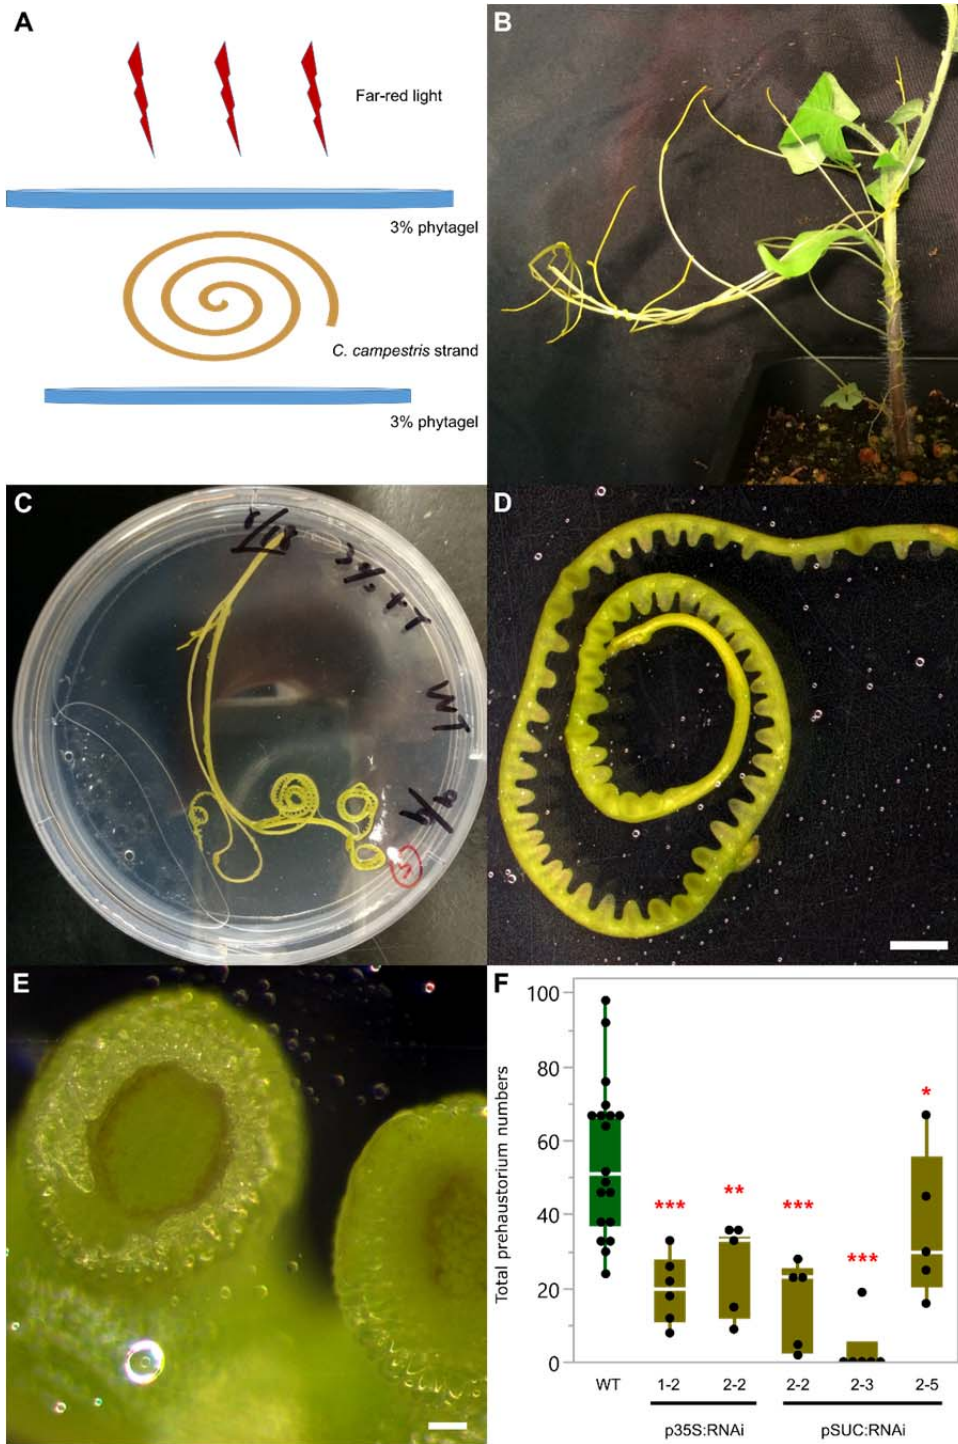

661

662 **Figure 7.** Far-red light-induced *in vitro* haustorium (IVH) phenotypes of *C. campestris*  
663 growing on HIGS *CcLBD25* RNAi transgenic plants. (A) An illustration of the setup for  
664 the IVH system. (B) *C. campestris* strands near the haustorium attachment sites. (C) An  
665 IVH plate with a *C. campestris* strand sandwiched in between two layers of agar to  
666 provide sufficient physical contact signals. (D, E) After illuminating these plates under  
667 far-light for 5 days, prehaustoria are readily visible. (D) Scale bar = 2 mm. (E) Scale bars  
668 = 100  $\mu$ m. (F) *C. campestris* strands were detached and subjected to IVH and the number  
669 of prehaustoria were counted. Data presented are assessed using one-tailed Welch's t-test  
670 with wild-type (WT) as control. “\*” p-value < 0.06. “\*\*” p-value < 0.001. “\*\*\*” p-value  
671 < 0.0005. p35S:RNAi indicates the transgenic plants with the 35S promoter driving  
672 *CcLBD25* RNAi construct. pSUC:RNAi indicates the transgenic plants with the SUC2  
673 promoter driving *CcLBD25* RNAi construct.

674

## Parsed Citations

**Agrios GN (2005) chapter thirteen - PLANT DISEASES CAUSED BY PARASITIC HIGHER PLANTS, INVASIVE CLIMBING PLANTS, AND PARASITIC GREEN ALGAE.** In *Plant Pathology* (Fifth Edition). Academic Press, San Diego, pp 705-722

Google Scholar: [Author Only](#) [Title Only](#) [Author and Title](#)

**Alakonya A, Kumar R, Koenig D, Kimura S, Townsley B, Runo S, Garces HM, Kang J, Yanez A, David-Schwartz R, Machuka J, Sinha N (2012) Interspecific RNA Interference of SHOOT MERISTEMLESS-Like Disrupts *Cuscuta pentagona* Plant Parasitism.** *The Plant Cell* 24: 3153-3166

Google Scholar: [Author Only](#) [Title Only](#) [Author and Title](#)

**Brendolise C, Montefiori M, Dinis R, Peeters N, Storey RD, Rikkerink EH (2017) A novel hairpin library-based approach to identify NBS-LRR genes required for effector-triggered hypersensitive response in *Nicotiana benthamiana*.** *Plant Methods* 13: 32

Google Scholar: [Author Only](#) [Title Only](#) [Author and Title](#)

**Chebli Y, Geitmann A (2017) Cellular growth in plants requires regulation of cell wall biochemistry.** *Current Opinion in Cell Biology* 44: 28-35

Google Scholar: [Author Only](#) [Title Only](#) [Author and Title](#)

**Clauset A, Newman MEJ, Moore C (2004) Finding community structure in very large networks.** *Physical Review E* 70: 066111

Google Scholar: [Author Only](#) [Title Only](#) [Author and Title](#)

**Cline MS, Smoot M, Cerami E, Kuchinsky A, Landys N, Workman C, Christmas R, Avila-Campilo I, Creech M, Gross B, Hanspers K, Isserlin R, Kelley R, Killcoyne S, Lotia S, Maere S, Morris J, Ono K, Pavlovic V, Pico AR, Vailaya A, Wang P-L, Adler A, Conklin BR, Hood L, Kuiper M, Sander C, Schmulevich I, Schwikowski B, Warner GJ, Ideker T, Bader GD (2007) Integration of biological networks and gene expression data using Cytoscape.** *Nat. Protocols* 2: 2366-2382

Google Scholar: [Author Only](#) [Title Only](#) [Author and Title](#)

**Costea M, García MA, Baute K, Stefanović S (2015) Entangled evolutionary history of *Cuscuta pentagona* clade: A story involving hybridization and Darwin in the Galapagos.** *TAXON* 64: 1225-1242

Google Scholar: [Author Only](#) [Title Only](#) [Author and Title](#)

**David-Schwartz R, Runo S, Townsley B, Machuka J, Sinha N (2008) Long-distance transport of mRNA via parenchyma cells and phloem across the host-parasite junction in *Cuscuta*.** *New Phytologist* 179: 1133-1141

Google Scholar: [Author Only](#) [Title Only](#) [Author and Title](#)

**Dean G, Casson S, Lindsey K (2004) KNAT6 gene of *Arabidopsis* is expressed in roots and is required for correct lateral root formation.** *Plant Molecular Biology* 54: 71-84

Google Scholar: [Author Only](#) [Title Only](#) [Author and Title](#)

**Furuhashi T, Furuhashi K, Weckwerth W (2011) The parasitic mechanism of the holostemparasitic plant *Cuscuta*.** *Journal of Plant Interactions* 6: 207-219

Google Scholar: [Author Only](#) [Title Only](#) [Author and Title](#)

**García MA, Costea M, Kuzmina M, Stefanović S (2014) Phylogeny, character evolution, and biogeography of *Cuscuta* (dodders; Convolvulaceae) inferred from coding plastid and nuclear sequences.** *American Journal of Botany* 101: 670-690

Google Scholar: [Author Only](#) [Title Only](#) [Author and Title](#)

**Goh T, Joi S, Mimura T, Fukaki H (2012) The establishment of asymmetry in *Arabidopsis* lateral root founder cells is regulated by LBD16/ASL18 and related LBD/ASL proteins.** *Development* 139: 883-893

Google Scholar: [Author Only](#) [Title Only](#) [Author and Title](#)

**Ichihashi Y, Aguilar-Martínez JA, Farhi M, Chitwood DH, Kumar R, Millon LV, Peng J, Maloof JN, Sinha NR (2014) Evolutionary developmental transcriptomics reveals a gene network module regulating interspecific diversity in plant leaf shape.** *Proceedings of the National Academy of Sciences* 111: E2616-E2621

Google Scholar: [Author Only](#) [Title Only](#) [Author and Title](#)

**Ichihashi Y, Hakoyama T, Iwase A, Shirasu K, Sugimoto K, Hayashi M (2020) Common Mechanisms of Developmental Reprogramming in Plants-Lessons From Regeneration, Symbiosis, and Parasitism.** *Frontiers in Plant Science* 11

Google Scholar: [Author Only](#) [Title Only](#) [Author and Title](#)

**Ichihashi Y, Kusano M, Kobayashi M, Suetsugu K, Yoshida S, Wakatake T, Kumaishi K, Shibata A, Saito K, Shirasu K (2017) Transcriptomic and Metabolomic Reprogramming from Roots to Haustoria in the Parasitic Plant, *Thesium chinense*.** *Plant and Cell Physiology* 59: 729-738

Google Scholar: [Author Only](#) [Title Only](#) [Author and Title](#)

**Jhu M-Y, Farhi M, Wang L, Philbrook RN, Belcher MS, Nakayama H, Zumstein KS, Rowland SD, Ron M, Shih PM, Sinha NR (2020) Lignin-based resistance to *Cuscuta campestris* parasitism in Heinz resistant tomato cultivars.** *bioRxiv*: 706861

Google Scholar: [Author Only](#) [Title Only](#) [Author and Title](#)

**Johnson NR, dePamphilis CW, Axtell MJ (2019) Compensatory sequence variation between trans-species small RNAs and their target sites.** *eLife* 8: e49750

Google Scholar: [Author Only](#) [Title Only](#) [Author and Title](#)

**Kim G, LeBlanc ML, Wafula EK, dePamphilis CW, Westwood JH (2014) Genomic-scale exchange of mRNA between a parasitic plant and its hosts. *Science* 345: 808-811**

Google Scholar: [Author Only](#) [Title Only](#) [Author and Title](#)

**Kim M, Kim M-J, Pandey S, Kim J (2016) Expression and Protein Interaction Analyses Reveal Combinatorial Interactions of LBD Transcription Factors During Arabidopsis Pollen Development. *Plant and Cell Physiology* 57: 2291-2299**

Google Scholar: [Author Only](#) [Title Only](#) [Author and Title](#)

**Kumar R, Ichihashi Y, Kimura S, Chitwood D, Headland L, Peng J, Maloof J, Sinha N (2012) A High-Throughput Method for Illumina RNA-Seq Library Preparation. *Frontiers in Plant Science* 3**

Google Scholar: [Author Only](#) [Title Only](#) [Author and Title](#)

**López-Ráez JA, Matusova R, Cardoso C, Jamil M, Charnikhova T, Kohlen W, Ruyter-Spira C, Verstappen F, Bouwmeester H (2009) Strigolactones: ecological significance and use as a target for parasitic plant control. *Pest Management Science* 65: 471-477**

Google Scholar: [Author Only](#) [Title Only](#) [Author and Title](#)

**Langmead B, Salzberg SL (2012) Fast gapped-read alignment with Bowtie 2. *Nature Methods* 9: 357-359**

Google Scholar: [Author Only](#) [Title Only](#) [Author and Title](#)

**Losner-Goshen D, Portnoy VH, Mayer AM, Joel DM (1998) Pectolytic Activity by the Haustorium of the Parasitic Plant *Orobanchaceae* in Host Roots. *Annals of Botany* 81: 319-326**

Google Scholar: [Author Only](#) [Title Only](#) [Author and Title](#)

**Mangeon A, Bell EM, Lin W-c, Jablonska B, Springer PS (2010) Misregulation of the LOB domain gene DDA1 suggests possible functions in auxin signalling and photomorphogenesis. *Journal of Experimental Botany* 62: 221-233**

Google Scholar: [Author Only](#) [Title Only](#) [Author and Title](#)

**Masumoto N, Suzuki Y, Cui S, Wakazaki M, Sato M, Kumaishi K, Shibata A, Furuta KM, Ichihashi Y, Shirasu K, Toyooka K, Sato Y, Yoshida S (2020) Three-dimensional reconstructions of the internal structures of haustoria in parasitic *Orobanchaceae*. *bioRxiv*: 2020.2005.2007.083055**

Google Scholar: [Author Only](#) [Title Only](#) [Author and Title](#)

**O'Brien TP, Feder N, McCully ME (1964) Polychromatic staining of plant cell walls by toluidine blue O. *Protoplasma* 59: 368-373**

Google Scholar: [Author Only](#) [Title Only](#) [Author and Title](#)

**Porco S, Larrieu A, Du Y, Gaudinier A, Goh T, Swarup K, Swarup R, Kuempers B, Bishopp A, Lavenus J, Casimiro I, Hill K, Benkova E, Fukaki H, Brady SM, Scheres B, Péret B, Bennett MJ (2016) Lateral root emergence in *Arabidopsis* is dependent on transcription factor LBD29 regulation of auxin influx carrier LAX3. *Development* 143: 3340-3349**

Google Scholar: [Author Only](#) [Title Only](#) [Author and Title](#)

**Ranjan A, Ichihashi Y, Farhi M, Zumstein K, Townsley B, David-Schwartz R, Sinha NR (2014) De Novo Assembly and Characterization of the Transcriptome of the Parasitic Weed Dodder Identifies Genes Associated with Plant Parasitism. *Plant Physiology* 166: 1186-1199**

Google Scholar: [Author Only](#) [Title Only](#) [Author and Title](#)

**Riboni M, Robustelli Test A, Galbiati M, Tonelli C, Conti L (2014) Environmental stress and flowering time: The photoperiodic connection. *Plant Signaling & Behavior* 9: e29036**

Google Scholar: [Author Only](#) [Title Only](#) [Author and Title](#)

**Robinson MD, McCarthy DJ, Smyth GK (2009) edgeR: a Bioconductor package for differential expression analysis of digital gene expression data. *Bioinformatics* 26: 139-140**

Google Scholar: [Author Only](#) [Title Only](#) [Author and Title](#)

**Runo S, Alakonya A, Machuka J, Sinha N (2011) RNA interference as a resistance mechanism against crop parasites in Africa: a 'Trojan horse' approach. *Pest Management Science* 67: 129-136**

Google Scholar: [Author Only](#) [Title Only](#) [Author and Title](#)

**Runyon JB, Mescher MC, Felton GW, De Moraes CM (2010) Parasitism by *Cuscuta pentagona* sequentially induces JA and SA defence pathways in tomato. *Plant, Cell & Environment* 33: 290-303**

Google Scholar: [Author Only](#) [Title Only](#) [Author and Title](#)

**Saffer AM (2018) Expanding roles for pectins in plant development. *Journal of Integrative Plant Biology* 60: 910-923**

Google Scholar: [Author Only](#) [Title Only](#) [Author and Title](#)

**Shen H, Ye W, Hong L, Huang H, Wang Z, Deng X, Yang Q, Xu Z (2006) Progress in Parasitic Plant Biology: Host Selection and Nutrient Transfer. *Plant Biology* 8: 175-185**

Google Scholar: [Author Only](#) [Title Only](#) [Author and Title](#)

**Shimizu K, Aoki K (2019) Development of Parasitic Organs of a Stem Holoparasitic Plant in Genus *Cuscuta*. *Frontiers in plant science* 10: 1435-1435**

Google Scholar: [Author Only](#) [Title Only](#) [Author and Title](#)

**Snowden KC, Simkin AJ, Janssen BJ, Templeton KR, Loucas HM, Simons JL, Karunairetnam S, Gleave AP, Clark DG, Klee HJ (2005)**



**The Decreased apical dominance1/Petunia hybrida CAROTENOID CLEAVAGE DIOXYGENASE8 Gene Affects Branch Production and Plays a Role in Leaf Senescence, Root Growth, and Flower Development. The Plant Cell 17: 746-759**

Google Scholar: [Author Only](#) [Title Only](#) [Author and Title](#)

**Stefanović S, Kuzmina M, Costea M (2007) Delimitation of major lineages within Cuscuta subgenus Grammica (Convolvulaceae) using plastid and nuclear DNA sequences. American Journal of Botany 94: 568-589**

Google Scholar: [Author Only](#) [Title Only](#) [Author and Title](#)

**Tada Y, Sugai M, Furuhashi K (1996) Haustoria of Cuscuta japonica, a Holoparasitic Flowering Plant, Are Induced by the Cooperative Effects of Far-Red Light and Tactile Stimuli. Plant and Cell Physiology 37: 1049-1053**

Google Scholar: [Author Only](#) [Title Only](#) [Author and Title](#)

**Townsley BT, Covington MF, Ichihashi Y, Zumstein K, Sinha NR (2015) BrAD-seq: Breath Adapter Directional sequencing: a streamlined, ultra-simple and fast library preparation protocol for strand specific mRNA library construction. Frontiers in Plant Science 6**

Google Scholar: [Author Only](#) [Title Only](#) [Author and Title](#)

**Vaughn KC (2002) Attachment of the parasitic weed dodder to the host. Protoplasma 219: 227-237**

Google Scholar: [Author Only](#) [Title Only](#) [Author and Title](#)

**Vogel A, Schwacke R, Denton AK, Usadel B, Hollmann J, Fischer K, Bolger A, Schmidt MHW, Bolger ME, Gundlach H, Mayer KFX, Weiss-Schneeweiss H, Tensch EM, Krause K (2018) Footprints of parasitism in the genome of the parasitic flowering plant Cuscuta campestris. Nature Communications 9: 2515**

Google Scholar: [Author Only](#) [Title Only](#) [Author and Title](#)

**Wada KC, Takeno K (2010) Stress-induced flowering. Plant Signaling & Behavior 5: 944-947**

Google Scholar: [Author Only](#) [Title Only](#) [Author and Title](#)

**Wehrens R, Buydens L (2007) Self- and Super-organizing Maps in R: The kohonen Package. Journal of Statistical Software 21: 1-19**

Google Scholar: [Author Only](#) [Title Only](#) [Author and Title](#)

**Wormit A, Usadel B (2018) The Multifaceted Role of Pectin Methylesterase Inhibitors (PMEIs). International journal of molecular sciences 19: 2878**

Google Scholar: [Author Only](#) [Title Only](#) [Author and Title](#)

**Yaakov G, Lanini WT, Wrobel RL (2001) Tolerance of Tomato Varieties to Lespedeza Dodder. Weed Science 49: 520-523**

Google Scholar: [Author Only](#) [Title Only](#) [Author and Title](#)

**Yang Z, Wafula EK, Honaas LA, Zhang H, Das M, Fernandez-Aparicio M, Huang K, Bandaranayake PCG, Wu B, Der JP, Clarke CR, Ralph PE, Landherr L, Altman NS, Timko MP, Yoder JI, Westwood JH, dePamphilis CW (2015) Comparative transcriptome analyses reveal core parasitism genes and suggest gene duplication and repurposing as sources of structural novelty. Molecular biology and evolution 32: 767-790**

Google Scholar: [Author Only](#) [Title Only](#) [Author and Title](#)

**Yoder JI, Scholes JD (2010) Host plant resistance to parasitic weeds; recent progress and bottlenecks. Current Opinion in Plant Biology 13: 478-484**

Google Scholar: [Author Only](#) [Title Only](#) [Author and Title](#)

**Yoshida S, Kim S, Wafula EK, Tanskanen J, Kim Y-M, Honaas L, Yang Z, Spallek T, Conn CE, Ichihashi Y, Cheong K, Cui S, Der JP, Gundlach H, Jiao Y, Hori C, Ishida JK, Kasahara H, Kiba T, Kim M-S, Koo N, Laohavisit A, Lee Y-H, Lumba S, McCourt P, Mortimer JC, Mutuku JM, Nomura T, Sasaki-Sekimoto Y, Seto Y, Wang Y, Wakatake T, Sakakibara H, Demura T, Yamaguchi S, Yoneyama K, Manabe R-i, Nelson DC, Schulman AH, Timko MP, dePamphilis CW, Choi D, Shirasu K (2019) Genome Sequence of Striga asiatica Provides Insight into the Evolution of Plant Parasitism. Current Biology 29: 3041-3052.e3044**

Google Scholar: [Author Only](#) [Title Only](#) [Author and Title](#)

**Zhao F, Chen W, Traas J (2018) Mechanical signaling in plant morphogenesis. Current Opinion in Genetics & Development 51: 26-30**

Google Scholar: [Author Only](#) [Title Only](#) [Author and Title](#)
